# Supplementary material for: The solid-state electrochemical reduction process of magnetite in Li batteries: in situ magnetic measurements toward electrochemical magnets
Source: Royal Society of Chemistry journal article supplement (doi:10.1039/c4tc00299g), 2014-01-01
Supplement: c4tc00299g1.pdf [file c4tc00299g1.pdf]

## Electronic Supplementary Information

### **Solid-state electrochemical reduction process of magnetite in Li batteries: in-situ magnetic measurements toward electrochemical magnets**

Tetsuya Yamada,<sup>a,b</sup> Kantaro Morita,<sup>a</sup> Keita Kume,<sup>a</sup> Hirofumi Yoshikawa<sup>\*,a</sup> and Kunio Awaga<sup>\*,a,b</sup>

<sup>a</sup>Research Center for Materials Science & Department of Chemistry, Nagoya University, Furo-cho, Nagoya 464-8602, Japan

<sup>b</sup>Core Research for Evolutional Science and Technology (CREST), Furo-cho, Nagoya 464-8602, Japan

*E-mail: yoshikawah@chem.nagoya-u.ac.jp, awaga.kunio@b.mbox.nagoya-u.ac.jp*

1. Calculation of battery capacity
2. In-situ magnetic measurement system
3. Magnetic data

## 1. Calculation of battery capacity

The theoretical capacity,  $C^{\text{calc}}$  (Ah/kg), is calculated, using the following equation<sup>S1</sup>:

$$C^{\text{calc}} = \frac{F}{3600 \cdot M_{\text{W}}} , \quad (\text{Eq. S1})$$

where  $F$  is the Faraday constant (96487 C/mol), and  $M_{\text{W}}$  (kg/mol) is the molar weight of the  $\text{Fe}_3\text{O}_4$  to store one electron. The number of reduced electrons during discharge was estimated by dividing the experimental capacity by the value of  $C^{\text{calc}}$ .

## 2. In-situ magnetic measurement system

A miniature lithium battery cell with a size of  $15 \times 7 \times 5 \text{ mm}^3$ , was prepared, which can be fit to a commercial SQUID susceptometer (Quantum Design MPMS). The anode was made of lithium metal, and the cathode was a mixture of  $\text{Fe}_3\text{O}_4$  nanoparticle, conductive carbon black, and PVDF. The separator was a glass microfiber filter. The battery cells were charged/discharged with a Hokuto Denko potentiometer (HJ1001-SM8A) in the SQUID.

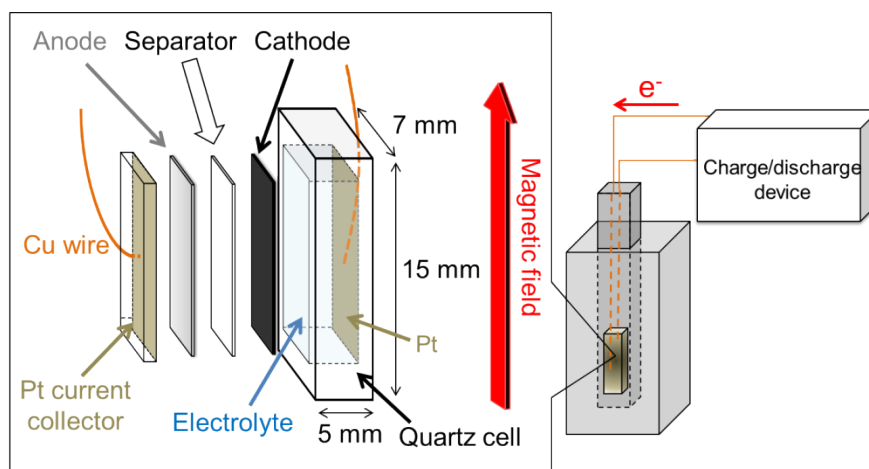

**Fig. S1** View of the miniature lithium battery cell for in-situ magnetic measurements

### 3. Magnetic data

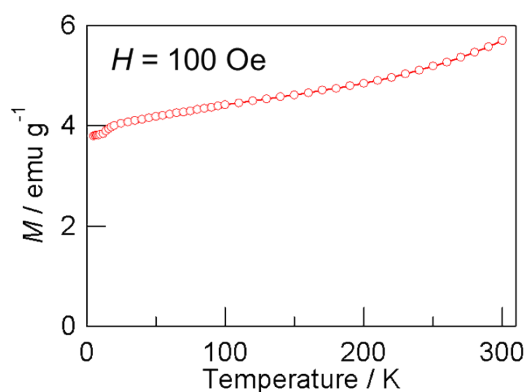

**Fig. S2** Temperature dependence of the magnetization of the as-purchased  $\text{Fe}_3\text{O}_4$  nanoparticles under the field of 100 Oe. The magnetization of the  $\text{Fe}_3\text{O}_4$  nanoparticles exhibits a gradual decrease with a decrease in temperature due to a ferrimagnetic interaction. The well-known metal-insulator phase transition in  $\text{Fe}_3\text{O}_4$  (Verwey transition), was not observed due to a nanosize effect.

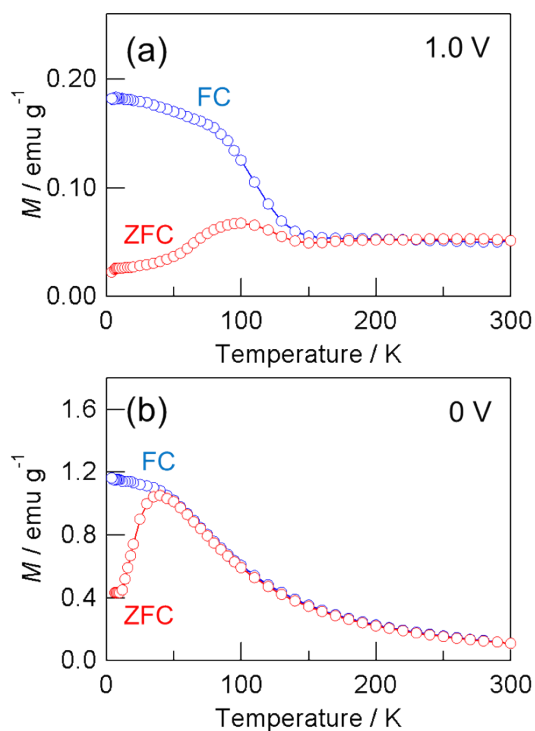

**Fig. S3** The field-cooled (FC) and zero-field-cooled (ZFC) curves for the cathode of the Li- $\text{Fe}_3\text{O}_4$  battery, at the voltages of 1.0 (a) and 0 V (b), under the field of 100 Oe. This cathode included the  $\text{Fe}_3\text{O}_4$  particles (10 wt%). The magnetic contributions from the quartz cell, Li metal, etc. were subtracted from the magnetization of the whole battery cell, to extract the magnetic properties of the cathode.

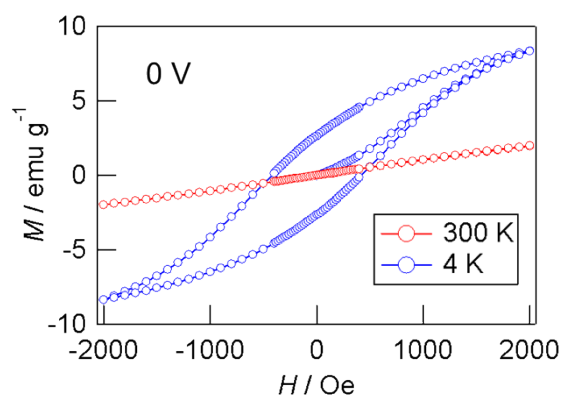

**Fig. S4** Magnetic hysteresis loops at measured at 4 and 300 K, for the cathode at 0 V.

## Reference

[S1] J. Qu, T. Katsumata, M. Satoh, J. Wada, J. Igarashi, K. Mizoguchi and T. Masuda, *Chem. Eur. J.*, 2007, **13**, 7965-7973.
